# Supplementary material for: miR‐132 loss de‐represses ITPKB and aggravates amyloid and TAU pathology in Alzheimer's brain
Source: PubMed Central journal article supplement (PMC5009807; doi:10.15252/emmm.201606520), 2016-08-02

**Figure 6**

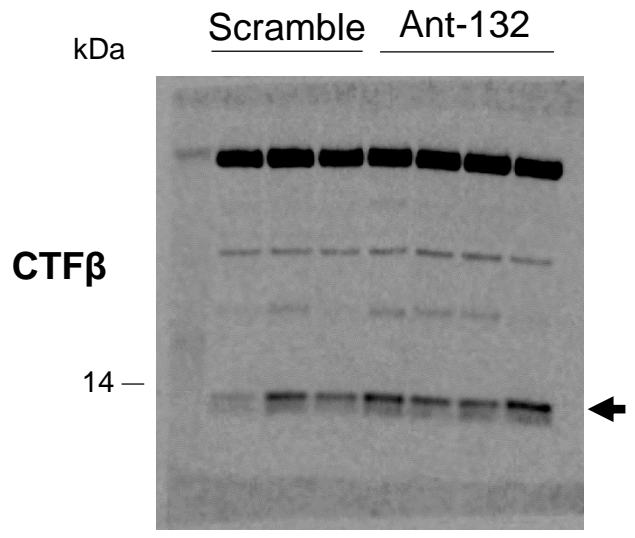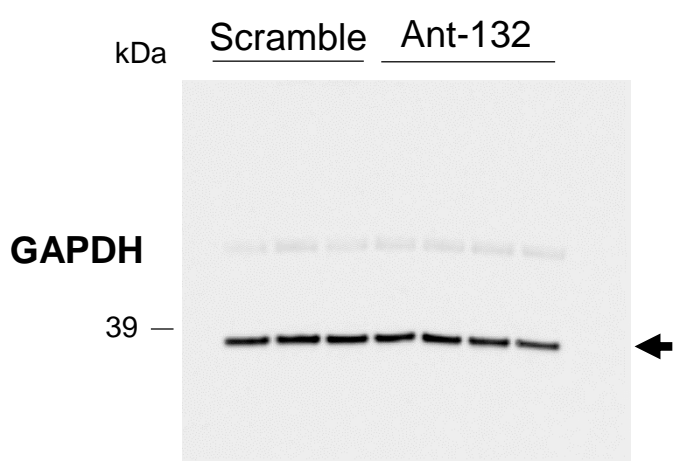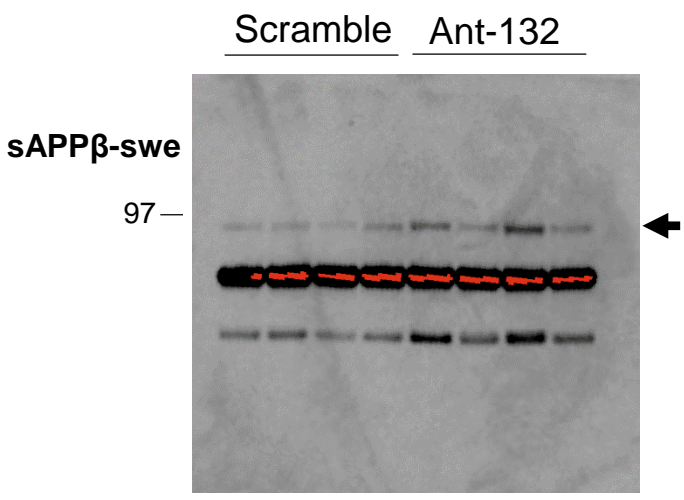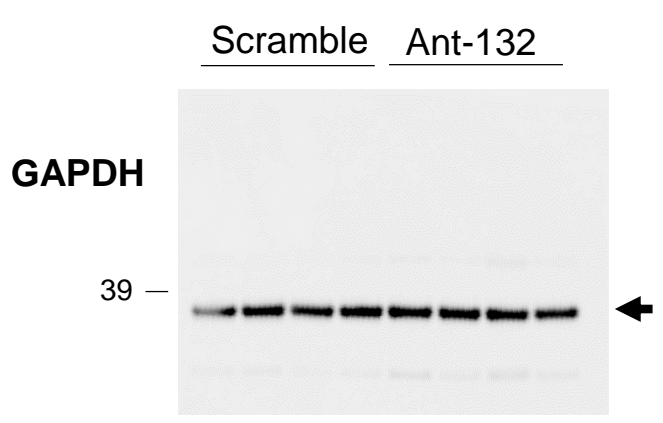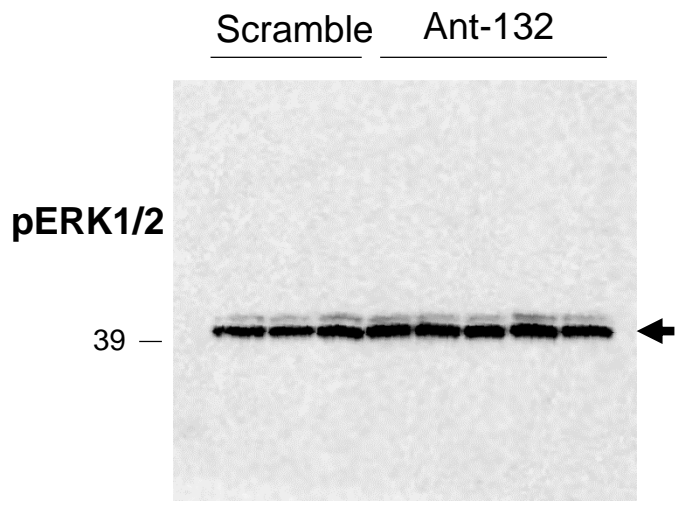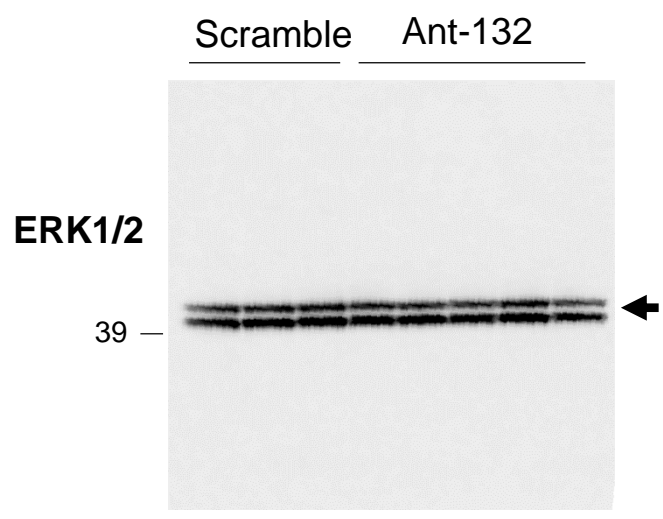

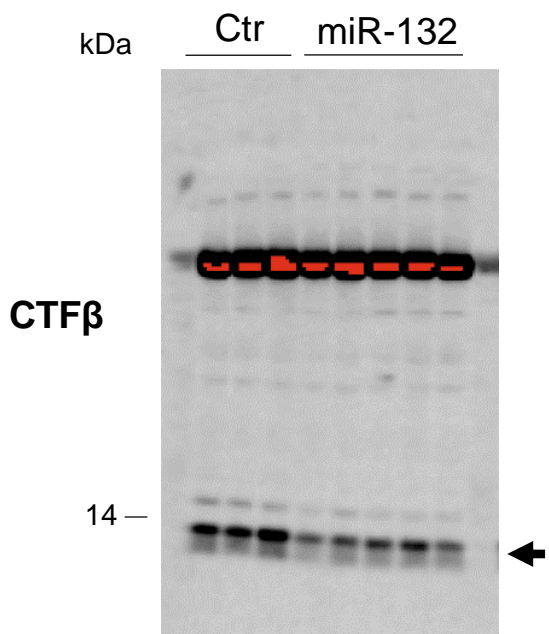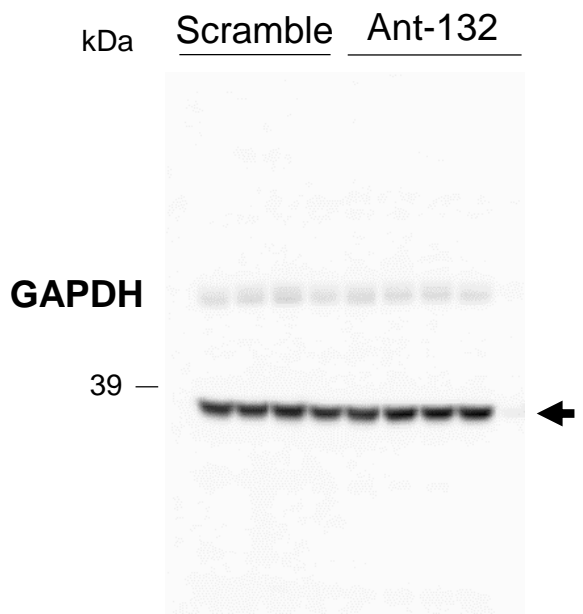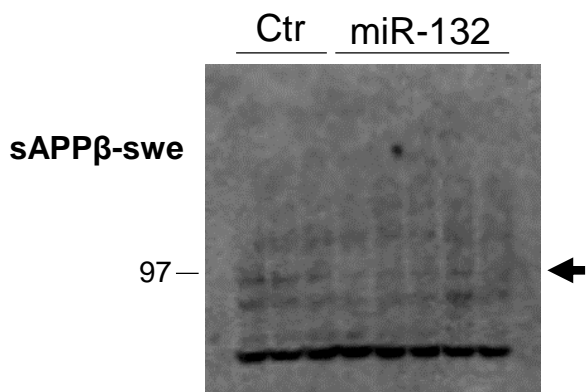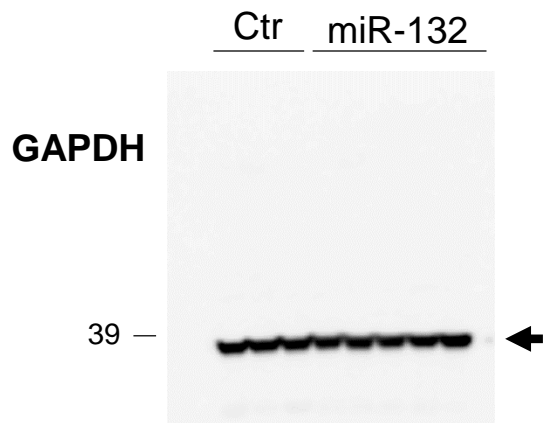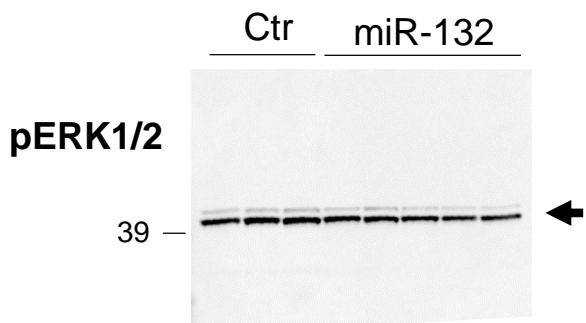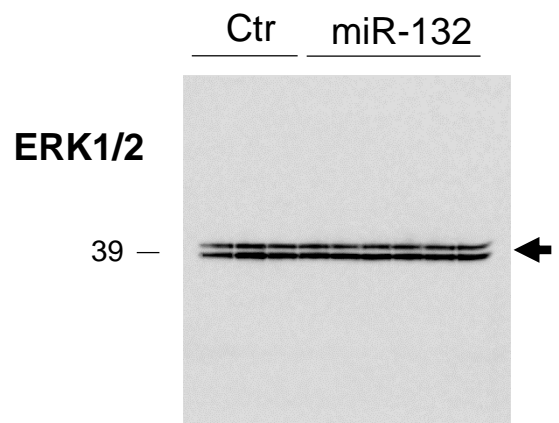

Supplement: EMMM-8-1005-s005.pdf [file EMMM-8-1005-s005.pdf]
